# Supplementary material for: Solubility and permeability enhancement of BCS class IV drug ribociclib through cocrystallization
Source: Royal Society of Chemistry journal article supplement (doi:10.1039/d2ce01288j), 2022-01-01
Supplement: d2ce01288j1.pdf [file d2ce01288j1.pdf]

### Electronic Supplementary Information†

Solubility and permeability enhancement of BCS class IV drug Ribociclib through cocrystallization

*M. K. Chaitanya Mannava,<sup>a</sup>, Abhijit Garai,<sup>a</sup> Manish K. Bommaka,<sup>a</sup> K. Anand Solomon,<sup>b\*</sup> and  
Ashwini K. Nangia<sup>a\*</sup>*

<sup>a</sup> School of Chemistry, University of Hyderabad, Central University P.O., Prof. C. R. Rao Road,  
Hyderabad 500046, India.

<sup>b</sup> Department of Chemistry, School of Engineering, Dayananda Sagar University, Kudlu Gate,  
Bangalore 560068, India

Correspondence email: [ashwini.nangia@gmail.com](mailto:ashwini.nangia@gmail.com), [anands-chem@dsu.edu.in](mailto:anands-chem@dsu.edu.in)

#### Contents:

1. IR spectra
2. PXRD for bulk-phase purity
3. PXRD after equilibrium solubility and IDR experiments
4. Crystallographic and hydrogen bond parameters
5. Equilibrium solubility, IDR and diffusion data

## 1. Infrared (IR) Spectroscopy

FT-IR spectroscopy is useful to understand the formation of cocrystal or salt and the presence of hydrogen bonds (peaks are listed in Table S1 and Fig. S1-S3. In RBC-RES complex, the C=O stretching frequency of CONMe<sub>2</sub> group is slightly red-shifted due to hydrogen bonding with OH of RES. Stretching frequency of OH and NH are shifted and the peaks are broader due to hydrogen bonding. In case of RBC-VA complex, the C=O stretching frequency of VA is significantly red-shifted from 1682 cm<sup>-1</sup> to 1600 cm<sup>-1</sup>, a clear indication of carboxylate anion from neutral COOH. Peaks of OH and NH stretching frequency are red-shifted and broadened in the hydrogen-bonded adducts.

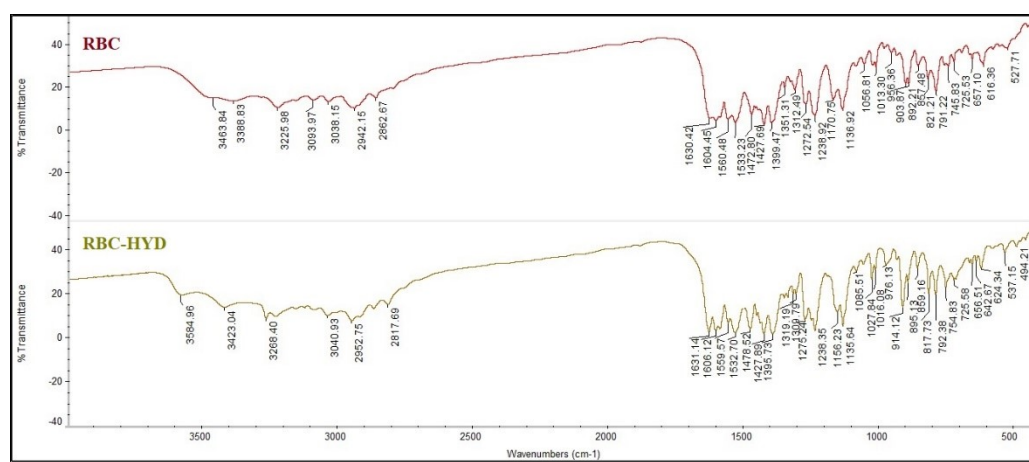

Fig. S1 IR spectra of RBC-HYD compared with the starting material RBC.

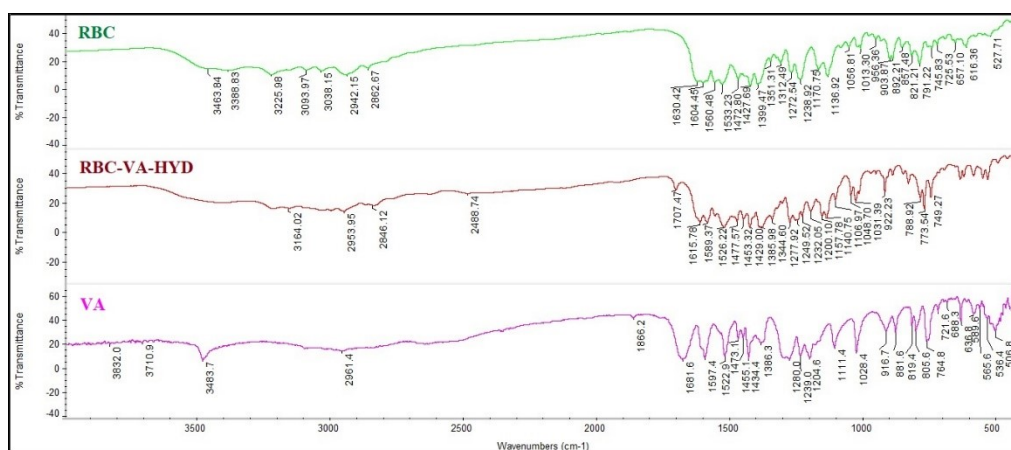

Fig. S2 IR spectra of RBC-VA-HYD compared with the starting material RBC and the coformer VA.

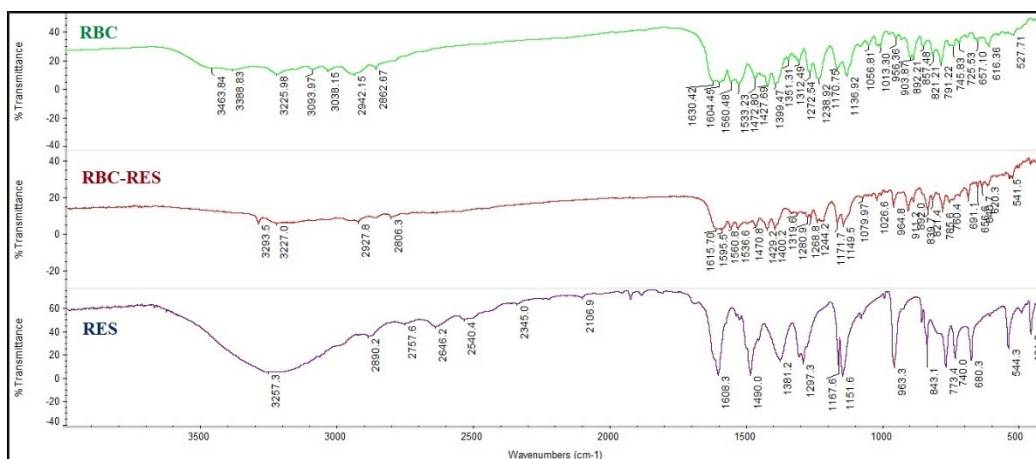

**Fig. S3** IR spectra of RBC-RES compared with the starting material RBC and the coformer RES.

**Table S1** FT-IR stretching frequency for COOH, COO<sup>-</sup>, NH/OH and aliphatic and aromatic CH peaks of RBC and coformers.

| Compound   | $\nu_{\text{C=O}}$ (cm <sup>-1</sup> ) for -COOH/<br>-COO-/<br>-CONMe <sub>2</sub> | $\nu_{\text{N-H/O-H}}$ (cm <sup>-1</sup> ) | $\nu_{\text{C-H}}$ (cm <sup>-1</sup> ) for<br>aliphatic and<br>aromatic CH |
|------------|------------------------------------------------------------------------------------|--------------------------------------------|----------------------------------------------------------------------------|
| RBC        | 1630, 1604                                                                         | 3464, 3389, 3226                           | 3094, 3038, 2942, 2863                                                     |
| RBC-HYD    | 1631, 1606                                                                         | 3585, 3423, 3268                           | 3041, 2953, 2818                                                           |
| RES        | ---                                                                                | 3257                                       | 2890, 2758                                                                 |
| RBC-RES    | 1616, 1596                                                                         | 3294, 3227                                 | 2928, 2806                                                                 |
| VA         | 1682                                                                               | 3484                                       | 2961                                                                       |
| RBC-VA-HYD | 1616, 1589                                                                         | 3400-3500 (broad),<br>3164                 | 2954, 2846                                                                 |

## 2. PXRD for bulk-phase purity

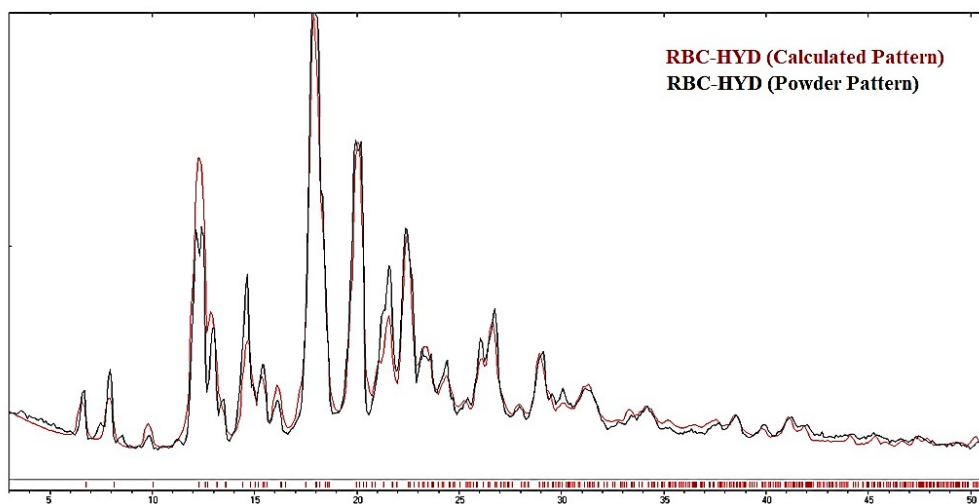

(a)

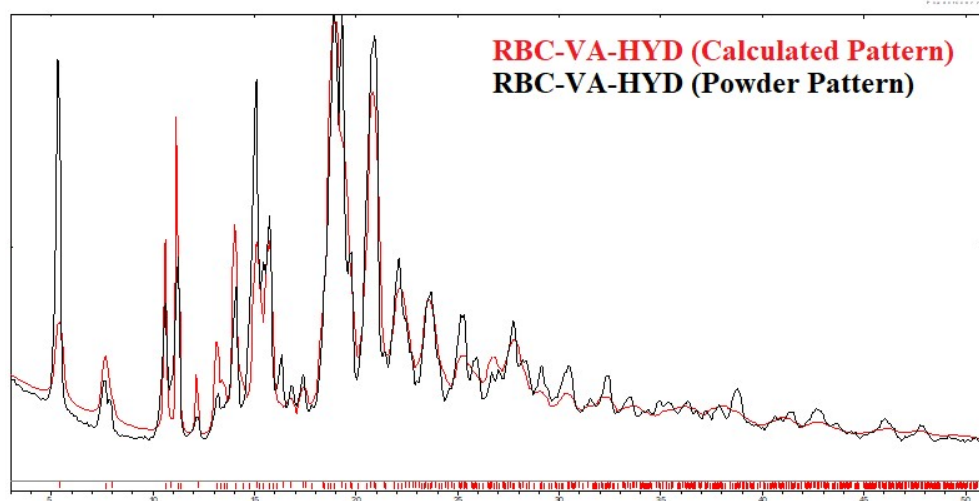

(b)

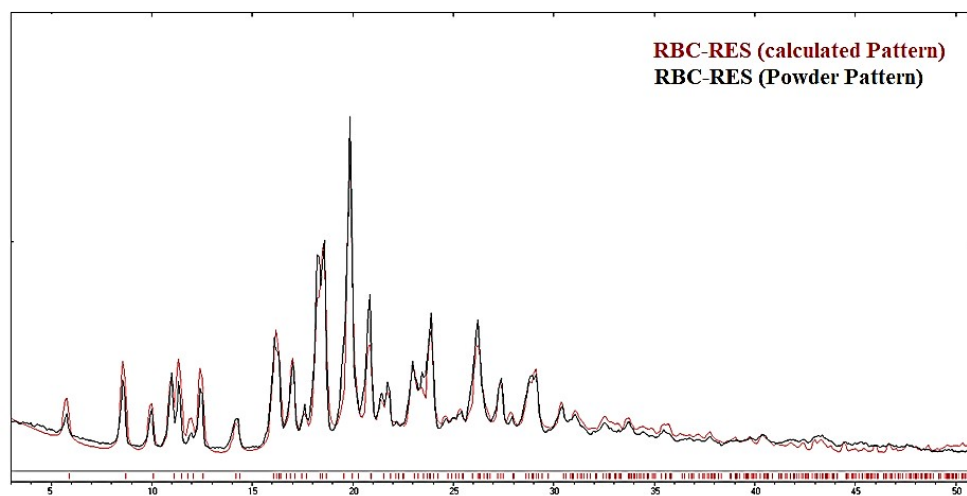

(c)

**Fig. S4** (a) The experimental PXRD pattern of RBC-HYD (b) multicomponent solids (RBC-VA-HYD) and (c) RBC-RES, (black) matches with the calculated line profile from the calculated X-ray crystal structure (red), indicating bulk purity and phase homogeneity. Rietveld refinement for RBC-HYD gave  $R_p = 0.1127$ ,  $R_{wp} = 0.1506$ ,  $R_{exp} = 0.1082$ ; RBC-VA-HYD gave  $R_p = 0.3254$ ,  $R_{wp} = 0.4650$ ,  $R_{exp} = 0.8823$ ; and for RBC-RES gave  $R_p = 0.1259$ ,  $R_{wp} = 0.1670$ ,  $R_{exp} = 0.7349$ .

The crystalline phase of RBC-HYD after heating and loss of water was confirmed to be the same as that of RBC (anhydrous) by using a combination of heat-cool cycle in TGA and then PXRD on the sample after cooling.

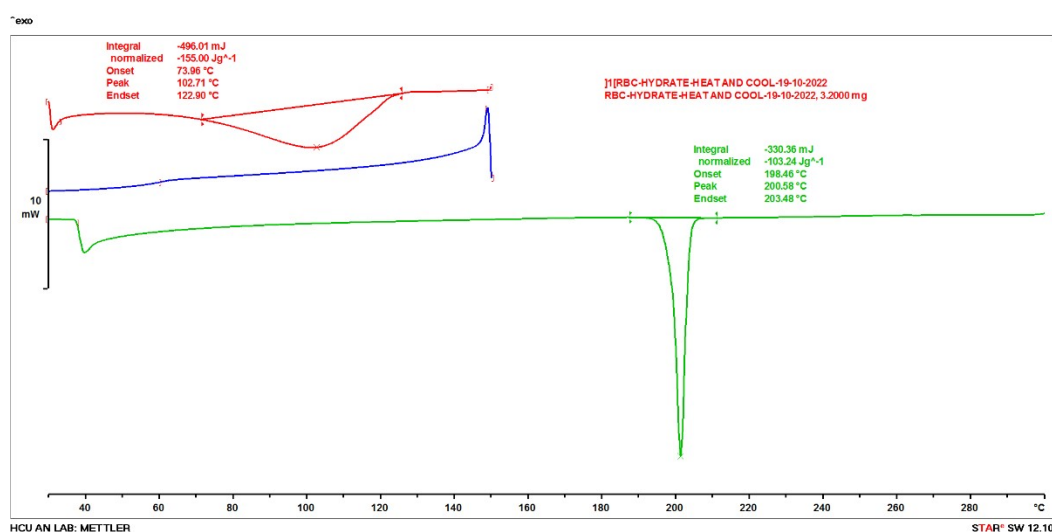

**Fig. S5.** Fresh sample of RBC after dehydration was prepared in DSC-TGA instrument after heating to 155 °C past the dehydration endotherm for water loss, then cooled to 40 °C and then re-heated to observe a DSC endotherm at the temperature matching with the melting of pure RBC (201-202 °C).

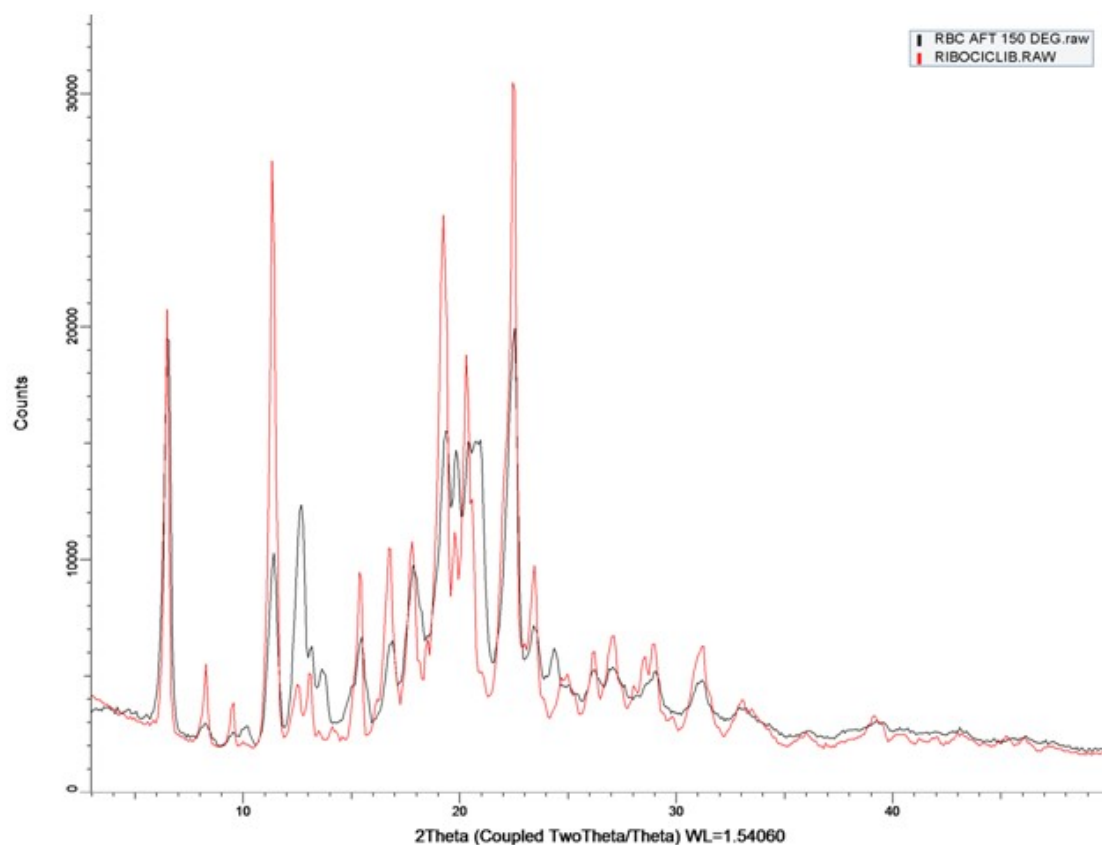

**Fig. S6** PXRD on the cooled solid was recorded to confirm that the RBC-HYD sample after heat-cool cycle matches with that of reference RBC.

### 3. PXRD after equilibrium solubility and IDR experiments

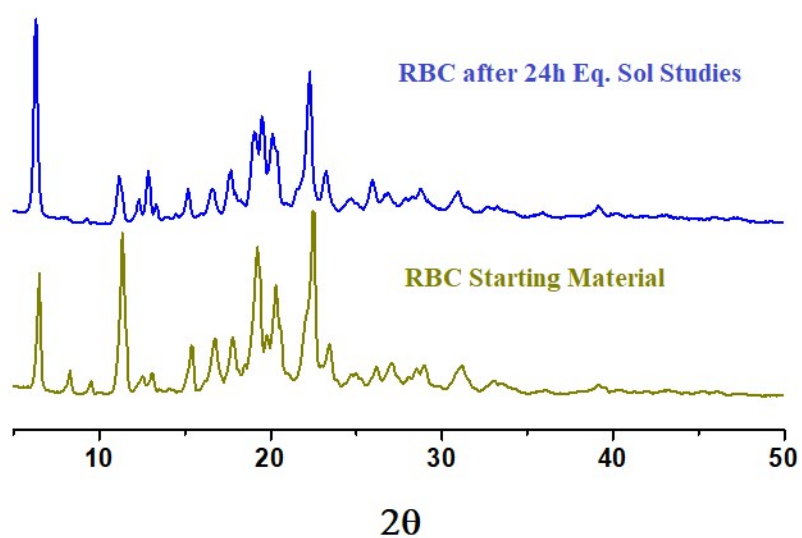

**Fig. S7** PXRD of RBC at the end of equilibrium solubility experiment (24 h, blue) matches with the initial PXRD pattern of RBC (green) indicating stable.

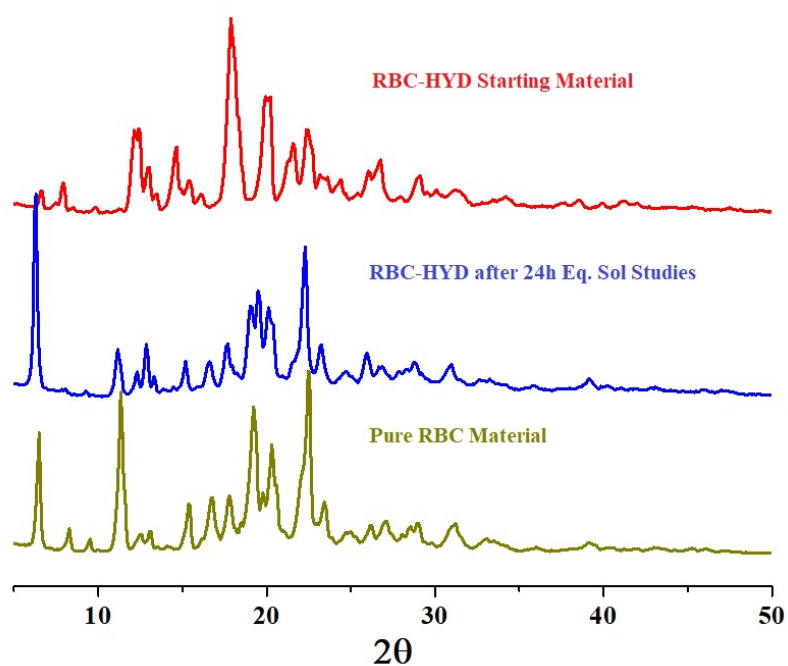

**Fig. S8** PXRD of RBC-HYD at the end of equilibrium solubility experiment (24 h, blue) does not match with the initial PXRD pattern of RBC-HYD (red) but the diffraction lines overlay with that of pure RBC (green) indicating unstable form.

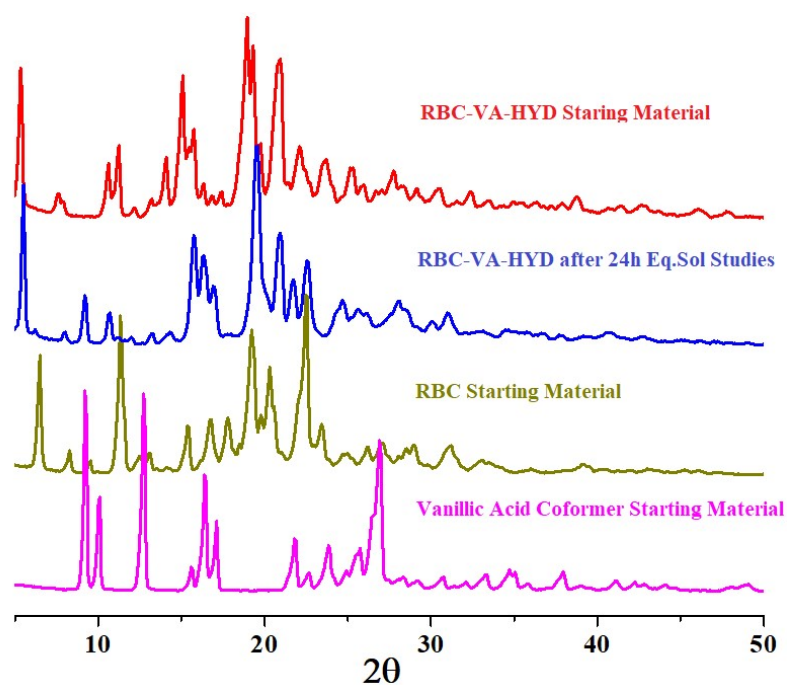

**Fig. S9** PXRD of RBC-VA-HYD salt at the end of equilibrium solubility experiment (24 h, blue) does not match with the initial PXRD pattern of RBC-VA-HYD (red) but the diffraction lines overlay with that of pure RBC (green) and the coformer vanillic acid indicating dissociation of the salt to the drug.

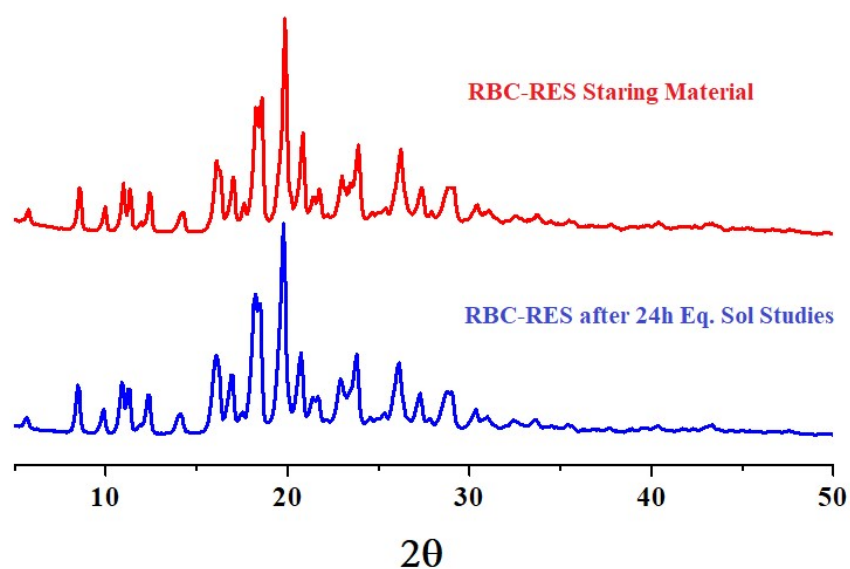

**Fig. S10** PXRD of RBC-RES cocrystal at the end of equilibrium solubility experiment (24 h, blue) matches with the initial PXRD pattern of RBC-RES (red) indicating phase stability.

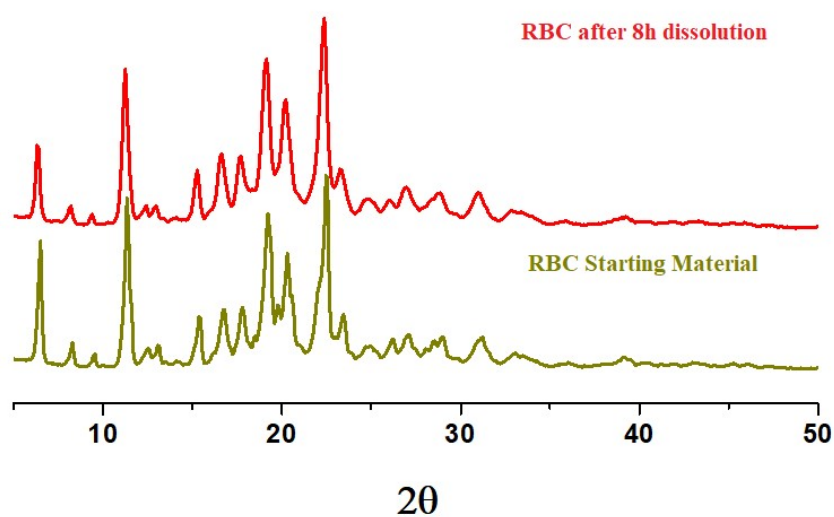

**Fig. S11** PXRD of RBC at the end of intrinsic dissolution rate experiment (8 h, red) matches with the initial PXRD pattern of RBC (green) indicating stable form.



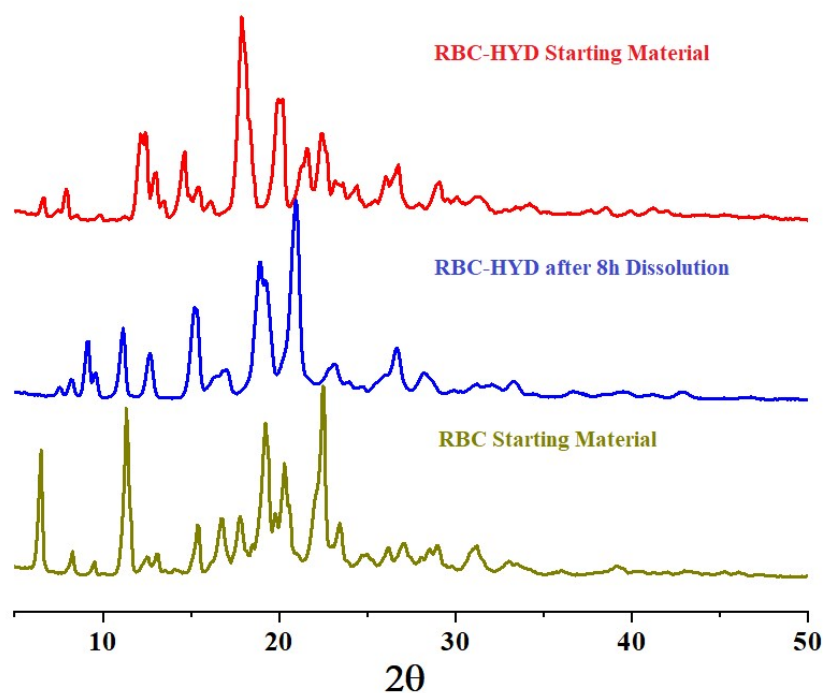

**Fig. S12** PXRD of RBC-HYD at the end of intrinsic dissolution rate experiment (8 h, blue) does not match with the initial PXRD pattern of RBC-HYD (red) but the diffraction lines overlay with that of pure RBC (green) indicating unstable form.

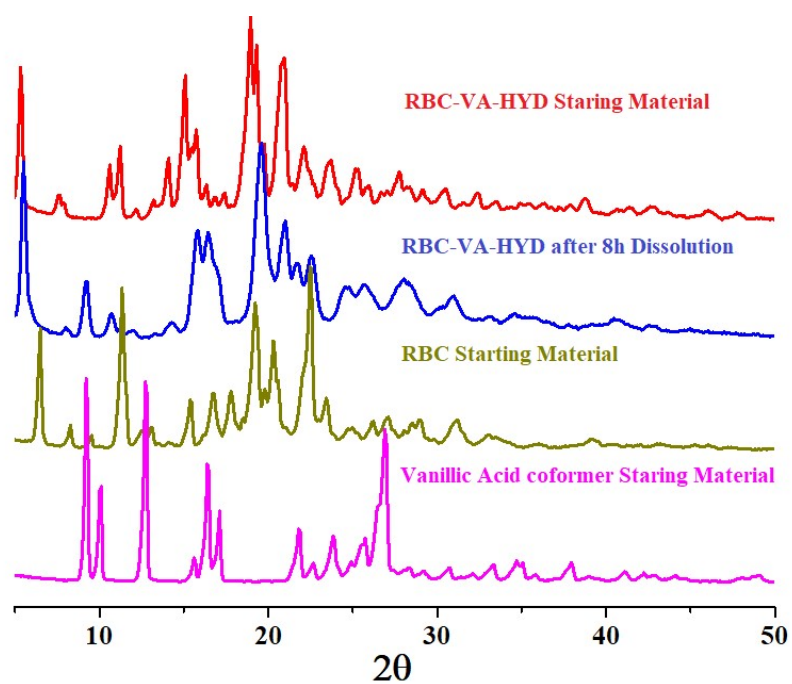

**Fig. S13** PXRD of RBC-VA-HYD salt at the end of intrinsic dissolution rate experiment (8 h, blue) does not match with the initial PXRD pattern of RBC-VA-HYD (red) but the diffraction lines overlay with that of pure RBC (green) and the coformer vanillic acid indicating dissociation of the salt to the drug.

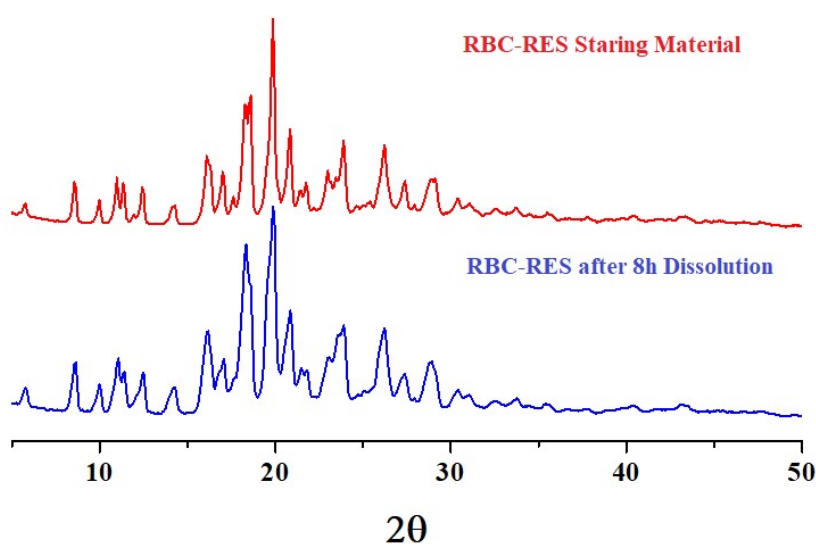

**Fig. S14** PXRD of RBC-RES cocrystal at the end of intrinsic dissolution rate experiment (8 h, blue) matches with the initial PXRD pattern of RBC-RES (red) indicating phase stability.

#### 4. Crystallographic and hydrogen bond parameters

**Table S2** Crystallographic parameters of RBC-HYD, RBC-VA-HYD and RBC-RES.

| Compound      | RBC-HYD                  | RBC-VA-HYD                          | RBC-RES                       |
|---------------|--------------------------|-------------------------------------|-------------------------------|
| Emp. formula  | $C_{23}H_{30}N_8O, H_2O$ | $C_{23}H_{31}N_8O, C_8H_7O_4, H_2O$ | $C_{23}H_{30}N_8O, C_6H_6O_2$ |
| Formula wt.   | 452.56                   | 620.71                              | 544.66                        |
| Cryst. System | monoclinic               | monoclinic                          | monoclinic                    |
| Space group   | $P2_1/n$                 | $P2_1/n$                            | $P2_1/c$                      |
| T (K)         | 293(2)                   | 293(2)                              | 293(2)                        |
| <i>a</i> (Å)  | 7.5763(6)                | 11.9881(8)                          | 8.5570(6)                     |
| <i>b</i> (Å)  | 25.947(2)                | 8.0148(5)                           | 29.967(2)                     |

|                       |             |             |            |
|-----------------------|-------------|-------------|------------|
| $c$ (Å)               | 12.1602(10) | 32.4063(19) | 11.5654(9) |
| $\alpha$ (deg)        | 90          | 90          | 90         |
| $\beta$ (deg)         | 100.659(4)  | 93.301(2)   | 111.625(2) |
| $\gamma$ (deg)        | 90          | 90          | 90         |
| $Z$                   | 4           | 4           | 4          |
| $V$ (Å <sup>3</sup> ) | 2349.2(3)   | 3108.5(3)   | 2756.9(4)  |
| Unique rflns          | 3024        | 5123        | 3522       |
| Obsd rflns            | 4898        | 7160        | 8212       |
| Parameters            | 307         | 413         | 375        |
| $R_1$                 | 0.0734      | 0.0667      | 0.0733     |
| $wR_2$                | 0.2192      | 0.1922      | 0.2015     |
| GOF                   | 1.065       | 0.991       | 1.016      |
| Diffractionmeter      | Bruker      | Bruker      | Bruker     |

**Table S3** Hydrogen bond parameters in RBC-HYD, RBC-VA-HYD and RBC-RES.

| D–H $\cdots$ A       | D $\cdots$ A / Å | H $\cdots$ A / Å | D–H $\cdots$ A / ° | symmetry code       |
|----------------------|------------------|------------------|--------------------|---------------------|
| RBC-HYD              |                  |                  |                    |                     |
| N5–H5N $\cdots$ N6   | 3.070(3)         | 2.23             | 165                | -x,1-y,2-z          |
| O1W–H1WA $\cdots$ N8 | 2.842(6)         | 2.03             | 160                | 3/2-x,-1/2+y,3/2-z  |
| O1W–H1WB $\cdots$ O1 | 2.693(5)         | 1.87             | 164                | x,y,z               |
| N8–H8N $\cdots$ N4   | 3.322(4)         | 2.59             | 160                | 1-x,1-y,2-z         |
| C19–H19 $\cdots$ N4  | 3.299(4)         | 2.54             | 139                | -x,1-y,2-z          |
| C5–H5 $\cdots$ O1W   | 3.263(6)         | 2.44             | 148                | -1+x,y,z            |
| C16–H16 $\cdots$ N3  | 2.907(4)         | 2.31             | 122                | Intra               |
| C3–H3A $\cdots$ O1W  | 3.254(8)         | 2.36             | 155                | -1+x,y,z            |
| C2–H2C $\cdots$ O1   | 2.678(6)         | 2.30             | 102                | Intra               |
| RBC-VA-HYD           |                  |                  |                    |                     |
| O5–H5O $\cdots$ O2   | 2.662(3)         | 1.86             | 167                | 3/2-x,-1/2+y,1/2-z  |
| N8–H8B $\cdots$ O3   | 2.847(3)         | 2.05             | 149                | 1/2-x,-1/2+y,1/2-z  |
| N5–H5N $\cdots$ N6   | 3.194(2)         | 2.34             | 171                | 1-x,-y,1-z          |
| N8–H8A $\cdots$ O3   | 2.755(3)         | 1.89             | 163                | x,-1+y,z            |
| O1W–H1WB $\cdots$ O2 | 2.822(3)         | 1.98             | 170                | x,-1+y,z            |
| O1W–H1WA $\cdots$ O1 | 2.930(3)         | 2.09             | 170                | -1/2+x,3/2-y,-1/2+z |
| C23–H23A $\cdots$ O1 | 3.412(3)         | 2.59             | 142                | 1-x,1-y,1-z         |
| C5–H5 $\cdots$ O2    | 3.334(3)         | 2.47             | 155                | 1/2+x,3/2-y,1/2+z   |

|               |          |      |     |                 |
|---------------|----------|------|-----|-----------------|
| C16-H16...N3  | 2.921(3) | 2.33 | 122 | Intra           |
| C12-H12A...N4 | 3.519(6) | 2.58 | 162 | x,1+y,z         |
| RBC-RES       |          |      |     |                 |
| N8-H8N...O2   | 3.080(4) | 2.22 | 151 | 1-x,1/2+y,1/2-z |
| O2-H2O...O1   | 2.651(3) | 1.87 | 159 | x,y,z           |
| O3-H3O...N8   | 2.767(4) | 1.97 | 165 | -x,1-y,-z       |
| N5-H5N...N4   | 3.092(3) | 2.34 | 168 | 2-x,1-y,-z      |
| C16-H16...N3  | 2.929(3) | 2.34 | 121 | Intra           |
| C2-H2C...O1   | 2.699(4) | 2.31 | 104 | Intra           |
| C12-H12A...N3 | 3.222(4) | 2.57 | 125 | Intra           |

## 5. Equilibrium solubility, IDR and diffusion data

**Table S4** Equilibrium solubility and IDR of RBC, RBC-HYD, RBC-VA-HYD and RBC-RES.

| API/Coformer | Solubility of API/coformer in water (mg. mL <sup>-1</sup> ) | Compound           | Equilibrium solubility of API/ salt/ cocrystal in PBS media | Intrinsic dissolution rate, IDR, mg. cm <sup>-2</sup> .min <sup>-1</sup> |
|--------------|-------------------------------------------------------------|--------------------|-------------------------------------------------------------|--------------------------------------------------------------------------|
| <b>RBC</b>   | 0.24                                                        | RBC                | 0.21                                                        | 0.07                                                                     |
|              |                                                             | RBC-HYD (1:1)      | 0.26                                                        | 0.08                                                                     |
| <b>VA</b>    | 18.6                                                        | RBC-VA-HYD (1:1:1) | 0.36                                                        | 0.16                                                                     |
| <b>RES</b>   | 82.3                                                        | RBC-RES (1:1)      | 0.44                                                        | 0.10                                                                     |

**Table S5** Cumulative Amount dissolved at different time intervals for RBC, RBC-HYD, RBC-VA-HYD and RBC-RES.

| Time Intervals (min) | Cumulative Amount dissolved (mg/500 mL) |         |         |            |
|----------------------|-----------------------------------------|---------|---------|------------|
|                      | RBC                                     | RBC-HYD | RBC-RES | RBC-VA-HYD |
| 0                    | 0                                       | 0       | 0       | 0          |
| 15                   | 1.5269                                  | 1.5619  | 1.9973  | 5.5109     |
| 30                   | 3.6112                                  | 2.6877  | 3.5179  | 8.7356     |
| 60                   | 6.1198                                  | 4.6337  | 7.2983  | 12.2371    |
| 90                   | 8.3114                                  | 6.7819  | 10.4213 | 15.3344    |
| 120                  | 9.9921                                  | 8.6363  | 12.5009 | 17.1801    |
| 150                  | 11.472                                  | 10.0326 | 14.6942 | 19.0496    |
| 180                  | 13.2223                                 | 11.1518 | 16.5058 | 20.2039    |
| 240                  | 15.6215                                 | 13.6379 | 20.4738 | 22.9811    |
| 300                  | 17.7944                                 | 16.4701 | 24.122  | 25.3469    |
| 360                  | 19.3799                                 | 18.8045 | 27.4791 | 27.4397    |
| 420                  | 21.0759                                 | 20.4162 | 31.1456 | 29.3505    |
| 480                  | 22.0148                                 | 21.7544 | 35.1877 | 30.9543    |

**Table S6** Cumulative Amount diffused at different time intervals for RBC, RBC-HYD, RBC-VA-HYD and RBC-RES

| Time Intervals (min) | Cumulative Amount diffused ( $\mu\text{g}/20\text{ mL}$ ) |          |          |            |
|----------------------|-----------------------------------------------------------|----------|----------|------------|
|                      | RBC                                                       | RBC-HYD  | RBC-RES  | RBC-VA-HYD |
| 0                    | 0                                                         | 0        | 0        | 0          |
| 15                   | 50.4257                                                   | 46.4926  | 59.802   | 13.0499    |
| 30                   | 152.4384                                                  | 142.3759 | 196.8701 | 29.4194    |
| 60                   | 256.9737                                                  | 230.9428 | 415.5304 | 55.5704    |
| 90                   | 351.9686                                                  | 309.6174 | 655.5796 | 128.9095   |
| 120                  | 432.7647                                                  | 377.5492 | 835.1077 | 202.4025   |
| 150                  | 521.5183                                                  | 449.0152 | 993.9157 | 280.2411   |
| 180                  | 615.9212                                                  | 553.9783 | 1118.458 | 411.7327   |
| 240                  | 714.1342                                                  | 652.0004 | 1393.689 | 607.9904   |
| 300                  | 828.1381                                                  | 734.7476 | 1647.857 | 884.4655   |
| 360                  | 924.4594                                                  | 827.3236 | 1843.419 | 1137.9103  |
| 420                  | 1002.991                                                  | 919.1742 | 2066.837 | 1319.8605  |
